# Supplementary material
Source: Springer Nature journal article supplement (https://www.springermedizin.de/resource/supplementary/13011_2011_204_MOESM1_ESM.pdf/9628610)

## Number of Patients Served per Year (n=276)

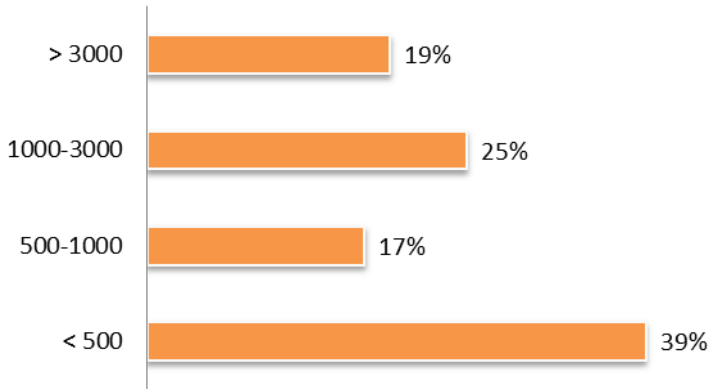

Supplement: MOESM1 [file 9628610]
